# Supplementary material
Source: PubMed Central journal article supplement (PMC6753581)
Supplement: NIHMS1050433-supplement-S1.pdf [file NIHMS1050433-supplement-S1.pdf]

**Table 2- MLSRI-20 intra-rater reliability by individual item within categories**

| Category and Item                    | Description                      | First Rating Mean (SD) | Second Rating Mean (SD) | ICC (95% CI)            |
|--------------------------------------|----------------------------------|------------------------|-------------------------|-------------------------|
| <b>What the Therapist SAYS</b>       |                                  |                        |                         |                         |
| 1                                    | Encouragement                    | 2.03 (0.89)            | 2.20 (0.92)             | 0.58 (0.12-0.80)        |
| 2                                    | Instructions- Object/Environment | 0.87 (0.86)            | 0.93 (0.98)             | 0.68 (0.32-0.85)        |
| 3                                    | Instructions- Body movement      | 1.53 (0.68)            | 1.47 (0.73)             | 0.55 (0.06-0.79)        |
| 4                                    | Asking rather than telling       | 0.60 (0.81)            | 0.40 (0.67)             | 0.88 (0.57-0.94)        |
| 5                                    | Feedback- Movement Performance   | 1.80 (0.85)            | 1.80 (0.76)             | <b>0.40</b> (0.00-0.72) |
| 6                                    | Feedback- Results                | 0.90 (0.88)            | 0.77 (0.94)             | 0.78 (0.53-0.89)        |
| 7                                    | Feedback- What was done well     | 0.47 (0.57)            | 0.53 (0.57)             | 0.54 (0.04-0.78)        |
| 8                                    | Feedback- What was done poorly   | 0.27 (0.45)            | 0.17 (0.38)             | <b>0.49</b> (0.00-0.76) |
| 9                                    | Link activities                  | 0.47 (1.01)            | 0.67 (1.09)             | 0.82 (0.64-0.92)        |
| 10                                   | Mental Practice                  | 0.07 (0.37)            | 0.07 (0.37)             | <b>0.00</b> (0.00-0.49) |
| <b>What the Therapist DOES</b>       |                                  |                        |                         |                         |
| 11                                   | Demonstration                    | 0.60 (1.10)            | 0.83 (1.26)             | 0.94 (0.87-0.97)        |
| 12                                   | Physical Guidance                | 2.97 (1.03)            | 3.10 (1.03)             | 0.86 (0.70-0.93)        |
| 13                                   | Errors as part of learning       | 1.43 (1.01)            | 1.60 (0.67)             | 0.73 (0.43-0.87)        |
| 14                                   | Recommends practice              | 0.07 (0.36)            | 0.00 (0.00)             | <b>0.00</b> (0.00-0.52) |
| 15                                   | Provides education               | 0.27(0.69)             | 0.13(0.51)              | <b>0.43</b> (0.00-0.73) |
| <b>How the Practice IS Organized</b> |                                  |                        |                         |                         |
| 16                                   | Repetitive                       | 3.90 (0.31)            | 3.87(0.43)              | 0.78 (0.53-0.89)        |
| 17                                   | Whole                            | 3.47 (0.78)            | 3.57 (0.86)             | 0.84 (0.66-0.92)        |
| 18                                   | Variable                         | 2.27 (1.14)            | 2.23 (1.19)             | 0.72 (0.41-0.87)        |
| 19                                   | Random                           | 0.97 (1.03)            | 1.00 (1.08)             | 0.83 (0.64-0.92)        |
| 20                                   | Progressive                      | 2.07 (1.28)            | 2.17 (1.12)             | 0.81 (0.60-0.91)        |
| <b>TOTAL SCORE</b>                   |                                  |                        |                         | 0.89 (0.76-0.95)        |

Bolded ICC indicates values in the 'poor' range<sup>21</sup>
