# Supplementary material
Source: PubMed Central journal article supplement (PMC6753581)
Supplement: NIHMS1050433-supplement-S2.pdf [file NIHMS1050433-supplement-S2.pdf]

**Table 3- Overview of MLSRI-20 utility based on PT rater feedback**

| MLSRI-20 Category         | Rating Ease* |          | Rating Confidence* |          | Category Score** |       | Comments      |                                                                                                                                                               |
|---------------------------|--------------|----------|--------------------|----------|------------------|-------|---------------|---------------------------------------------------------------------------------------------------------------------------------------------------------------|
|                           | Mean (SD)    | Range    | Mean (SD)          | Range    | Mean (SD)        | Range | Videos (n=30) | Most Frequently Reported Challenges                                                                                                                           |
| What the Therapist SAYS   | 6.5 (2.1)    | 1.3-10.0 | 6.3 (2.3)          | 0.9-10.0 | 9.5 (3.2)        | 3-14  | 20            | Hearing what the PT said (9 comments)<br>Distinguishing between instructions and feedback (6 comments)                                                        |
| What the Therapist DOES   | 7.5 (1.7)    | 1.9-10.0 | 7.8 (1.6)          | 3.0-10.0 | 5.5 (1.6)        | 3-9   | 11            | Scoring 'provides environment where errors are a part of learning' (5 comments)<br>Determining amount of 'physical guidance' provided by Lokomat (3 comments) |
| How Practice IS Organized | 7.4 (2.4)    | 0.7-10.0 | 7.0 (2.6)          | 0.7-10.0 | 12.7 (2.4)       | 7-19  | 9             | Defining the tasks within a session (4 comments)                                                                                                              |

\* VAS scores out of 10

\*\* Category score out of 40 (What the therapist SAYS), 20 (What the therapist DOES), 20 (How practice IS) points
