# Supplementary material
Source: PubMed Central journal article supplement (PMC6753581)
Supplement: NIHMS1050433-supplement-S3.pdf [file NIHMS1050433-supplement-S3.pdf]

Video number: \_\_\_\_\_

Rating date: \_\_\_\_\_

Rater ID: \_\_\_\_\_

### Motor Learning Strategy Rating Instrument-20 Score Form

| Please rate the <u>extent to which</u> these strategies occur in the session as a whole: | Very little<br>0-5% | Somewhat<br>6-24% | Often<br>25-49% | Very often<br>50-75% | Mostly<br>76-100% |
|------------------------------------------------------------------------------------------|---------------------|-------------------|-----------------|----------------------|-------------------|
| <b>A) Therapist verbalizations:</b>                                                      |                     |                   |                 |                      |                   |
| 1. Provide encouragement                                                                 | 0                   | 1                 | (2)             | 3                    | 4                 |
| 2. Direct client's attention to object or environment                                    | 0                   | 1                 | (2)             | 3                    | 4                 |
| 3. Direct client's attention to body movement                                            | (0)                 | 1                 | 2               | 3                    | 4                 |
| 4. Involve 'asking' (rather than 'telling')                                              | 0                   | (1)               | 2               | 3                    | 4                 |
| 5. Relate to movement performance                                                        | 0                   | (1)               | 2               | 3                    | 4                 |
| 6. Relate to results                                                                     | 0                   | 1                 | (2)             | 3                    | 4                 |
| 7. Relate to what was done well                                                          | 0                   | 1                 | (2)             | 3                    | 4                 |
| 8. Relate to what was done poorly                                                        | (0)                 | 1                 | 2               | 3                    | 4                 |
| 9. Link activity being practiced to other activities                                     | 0                   | -                 | 2               | -                    | (4)               |
| 10. Encourage the client to undertake mental practice                                    | (0)                 | -                 | 2               | -                    | 4                 |

|                                                                 |     |     |   |     |     |
|-----------------------------------------------------------------|-----|-----|---|-----|-----|
| <b>B) The therapist:</b>                                        |     |     |   |     |     |
| 11. Uses demonstration/modeling                                 | 0   | 1   | 2 | (3) | 4   |
| 12. Provides physical guidance                                  | 0   | 1   | 2 | (3) | 4   |
| 13. Provides an environment where errors are a part of learning | 0   | (1) | 2 | 3   | 4   |
| 14. Recommends practice outside of therapy                      | 0   | -   | 2 | -   | (4) |
| 15. Provides training or education to client/caregiver          | (0) | -   | 2 | -   | 4   |

|                                     |     |     |     |   |     |
|-------------------------------------|-----|-----|-----|---|-----|
| <b>C) Practice is:</b>              |     |     |     |   |     |
| 16. Repetitive                      | 0   | 1   | 2   | 3 | (4) |
| 17. Whole (rather than part)        | 0   | 1   | 2   | 3 | (4) |
| 18. Variable (rather than constant) | 0   | 1   | (2) | 3 | 4   |
| 19. Random (rather than blocked)    | (0) | 1   | 2   | 3 | 4   |
| 20. Progressive                     | 0   | (1) | 2   | 3 | 4   |
